# Supplementary material for: Superparamagnetic iron oxide nanoparticles coated with a folate-conjugated polymer
Source: Royal Society of Chemistry journal article supplement (doi:10.1039/b910439a), 2009-01-01
Supplement: b910439a.pdf [file b910439a.pdf]

## Supplementary data:

### Superparamagnetic Iron Oxide Nanoparticles Coated with a Folate-Conjugated Polymer

Quan Zhang,<sup>a,b</sup> Chenhong Wang,<sup>b</sup> Lei Qiao,<sup>b</sup> Husheng Yan<sup>\*a</sup> and Kelian Liu<sup>\*a,b</sup>

<sup>a</sup>Key Laboratory of Functional Polymer Materials, Ministry of Education; Institute of Polymer Chemistry, Nankai University, Tianjin 300071, China, and <sup>b</sup>Beijing Institute of Pharmacology & Toxicology, Beijing 100850, China. E-mail address: [keliangliu55@126.com](mailto:keliangliu55@126.com) (K. Liu) or [yanhs@nankai.edu.cn](mailto:yanhs@nankai.edu.cn) (H. Yan)

#### Experimental details for synthesis of ATRP initiator (1) (Scheme S1).

Compound (**3**) was synthesized according to the method previously described.<sup>1</sup> Compound (**3**) (5.60 g, 29.0 mmol) was dissolved in 45 mL of 5 wt% NaHCO<sub>3</sub> aqueous solution and the mixture cooled to 0 °C. A solution of Fmoc-Cl (5.00 g, 19.3 mmol) in dioxane (25 mL) was added, and the resulting mixture was stirred for 2 hrs at 0 °C, then 20 hrs at ambient temperature. After water was added (80 mL), the mixture was extracted with ethyl acetate (4 × 100 mL). The combined extracts were dried with magnesium sulfate and evaporated under reduced pressure to leave a yellow oil, which was purified by column chromatography on silica using ethyl acetate/petroleum ether (EtOAc/PE 3:1) as the eluent to give the compound (**2**) (7.20 g, 90%). R<sub>f</sub> 0.24 (EtOAc). δ<sub>H</sub>(400 MHz, CDCl<sub>3</sub>) 7.77 (2 H, d, fluor), 7.64 (2 H, d, fluor), 7.41-7.29 (4 H, dt, fluor), 4.42 (2 H, d, fluor-CH<sub>2</sub>O), 4.22 (1 H, t, (C9)), 3.54-3.70 (14 H, m, CH<sub>2</sub>OCH<sub>2</sub>, HOCH<sub>2</sub>), 3.40 (2 H, t, CH<sub>2</sub>NH). MS (HRMS) m/z 438.2 (M+Na)<sup>+</sup> (calculated), m/z 438.4 (found).

Compound **(2)** (7.20 g, 17.3 mmol) was dissolved in anhydrous THF (60 mL) followed by the addition of excess triethylamine (3.3 mL). The resulting solution was cooled in an ice bath, and 2-bromoisobutyryl bromide (2.9 mL, 23.5 mmol) was added to the stirred solution using a dropping funnel. The reaction was quite rapid, and a white precipitate of triethylammonium hydrobromide was formed. After stirring the mixture for 20 hrs, the white precipitate was removed by filtration, and 100 mL of a 3 wt% NaHCO<sub>3</sub> aqueous solution was added to the purified solution. The product was extracted with ethyl acetate (4 × 100 mL), and the combined extracts were dried with magnesium sulfate and concentrated under vacuum. The oil residue was finally purified on a silica gel column that was eluted with EtOAc/PE (1:2) to give ATRP initiator **(1)** (8.93 g, 91%). R<sub>f</sub> 0.29 (EtOAc/PE 1:1). δ<sub>H</sub>(400 MHz, CDCl<sub>3</sub>) 7.78 (2 H, d, fluor), 7.62 (2 H, d, fluor), 7.42-7.30 (4 H, dt, fluor), 4.42 (2 H, d, fluor-CH<sub>2</sub>O), 4.32 (2 H, t, CH<sub>2</sub>OCO), 4.22 (1 H, t, (C9)), 3.54-3.70 (12 H, m, CH<sub>2</sub>OCH<sub>2</sub>), 3.41 (2 H, t, CH<sub>2</sub>NH), 1.93 (6 H, s, C(CH<sub>3</sub>)<sub>2</sub>). MS (HRMS) m/z 586.15 (M+Na)<sup>+</sup> (calculated), m/z 586.3 (found).

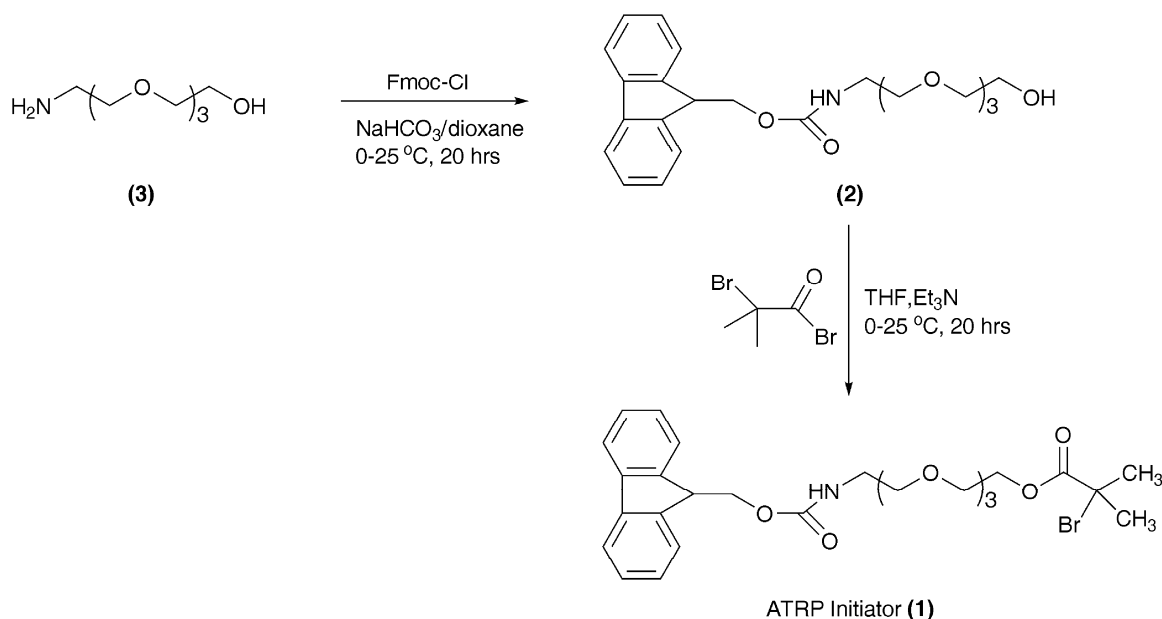

**Scheme S1** Synthesis route of ATRP initiator **(1)**.

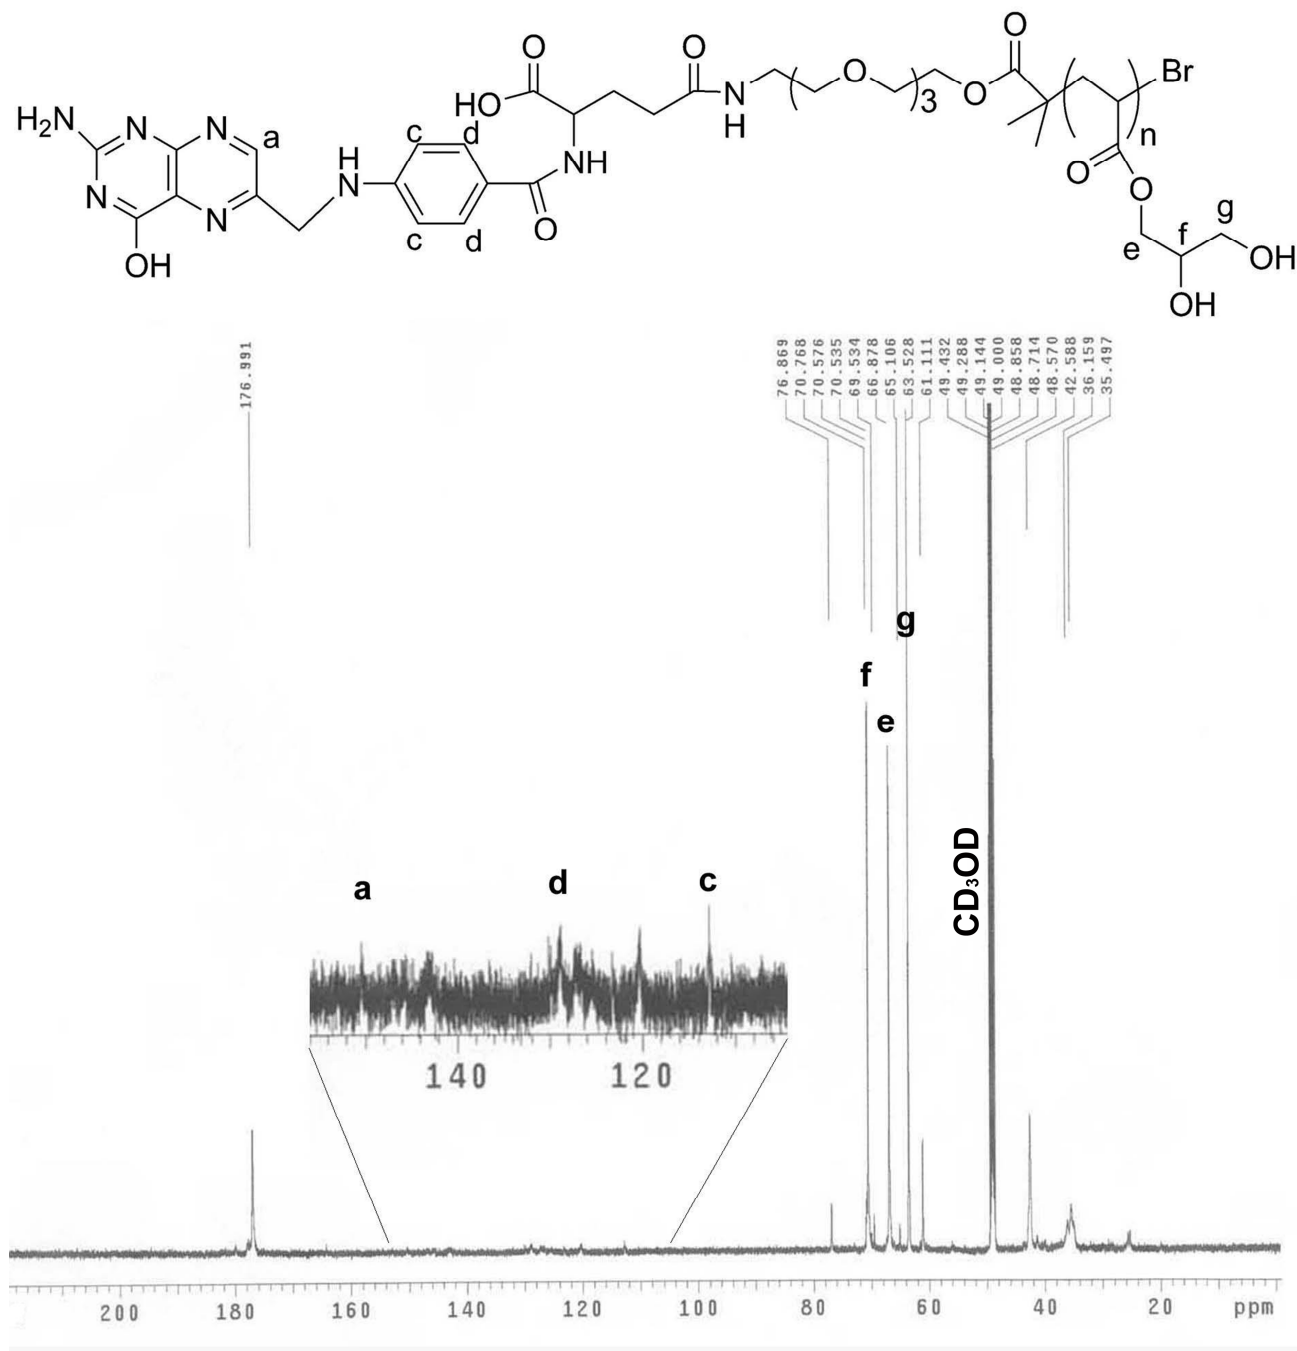

**Fig. S1**  $^{13}\text{C}$  NMR spectrum of FA-TEG-PGA.

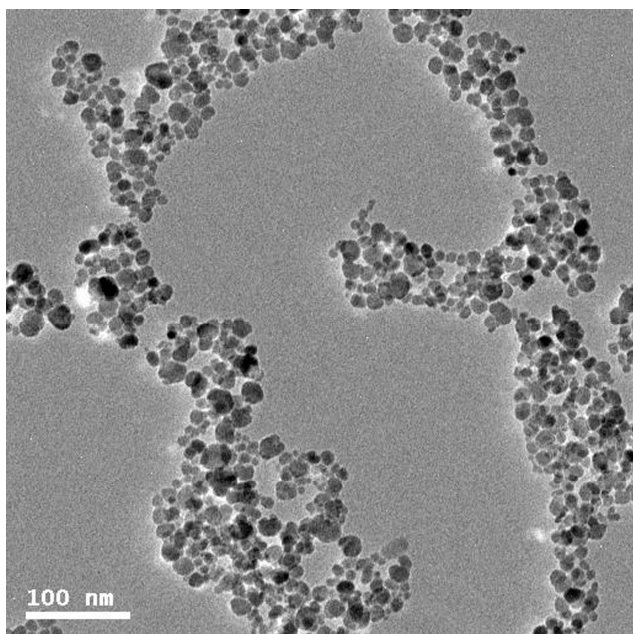

**Fig. S2** TEM image of HClO<sub>4</sub>-stabilized Fe<sub>3</sub>O<sub>4</sub> nanoparticles.

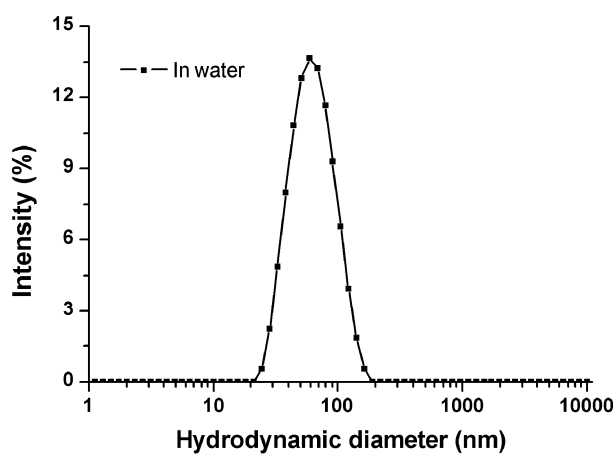

**Fig. S3** DLS analysis of FA-TEG-PGA-coated Fe<sub>3</sub>O<sub>4</sub> nanoparticles in water (1 mg mL<sup>-1</sup>).



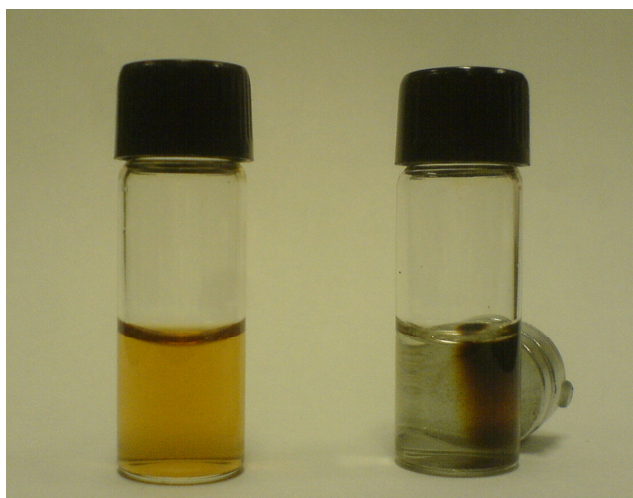

**Fig. S4** Photograph indicating the attraction of FA-TEG-PGA-coated  $\text{Fe}_3\text{O}_4$  nanoparticles dispersed in water by a magnet.

---

i B. Frisch, C. Boeckler and F. Schuber, *Bioconjugate Chem.*, 1996, **7**, 180.
